# Supplementary material
Source: PubMed Central journal article supplement (PMC4821828)
Supplement: NIHMS720512-supplement-Supp_TableS1-S8___FigureS1-S15.pdf [file NIHMS720512-supplement-Supp_TableS1-S8___FigureS1-S15.pdf]

**Table S1.** Joint ratings of endometriosis diagnosis (present/absent) between operating surgeon (OS) and blinded experts (R1-R4) based on empiric assessment after viewing digital images (n=148)

|    |     |     |    | % Classified Same | $\kappa$ (95% CI)<br>P-value* |
|----|-----|-----|----|-------------------|-------------------------------|
|    |     | R1  |    |                   |                               |
| OS |     | Yes | No | 84.6              | 0.63 (0.48, 0.79)<br>P=0.001  |
|    | Yes | 73  | 11 |                   |                               |
| No | 7   | 26  |    |                   |                               |
|    |     | R2  |    | 80.2              | 0.55 (0.41, 0.69)<br>P=0.02   |
| OS |     | Yes | No |                   |                               |
|    | Yes | 85  | 19 |                   |                               |
| No | 10  | 33  |    |                   |                               |
|    |     | R3  |    | 84.4              | 0.63 (0.47, 0.79)<br>P=0.002  |
| OS |     | Yes | No |                   |                               |
|    | Yes | 68  | 11 |                   |                               |
| No | 6   | 24  |    |                   |                               |
|    |     | R4  |    | 84.3              | 0.62 (0.47, 0.78)<br>P=0.002  |
| OS |     | Yes | No |                   |                               |
|    | Yes | 76  | 13 |                   |                               |
| No | 6   | 26  |    |                   |                               |

\*Test of H0:  $\kappa = 0.40$  against H1:  $\kappa = 0.75$

**Table S2.** Joint ratings of endometriosis diagnosis (present/absent) between operating surgeon (OS) and blinded experts (R1-R4) based on empiric assessment after viewing digital images and operative report/drawing (n=148)

|           |     | <b>R1</b> |    | <b>% Classified Same</b> | <b>κ (95% CI)<br/>P-value*</b> |
|-----------|-----|-----------|----|--------------------------|--------------------------------|
|           |     | Yes       | No |                          |                                |
| <b>OS</b> | Yes | 102       | 1  | 93.0%                    | 0.82 (0.71, 0.92)<br>P<0.001   |
|           | No  | 9         | 31 |                          |                                |
|           |     | <b>R2</b> |    |                          |                                |
|           |     | Yes       | No |                          |                                |
| <b>OS</b> | Yes | 102       | 3  | 94.6%                    | 0.87 (0.78, 0.96)<br>P<0.001   |
|           | No  | 5         | 38 |                          |                                |
|           |     | <b>R3</b> |    |                          |                                |
|           |     | Yes       | No |                          |                                |
| <b>OS</b> | Yes | 92        | 4  | 93.2%                    | 0.83 (0.72, 0.94)<br>P<0.001   |
|           | No  | 5         | 32 |                          |                                |
|           |     | <b>R4</b> |    |                          |                                |
|           |     | Yes       | No |                          |                                |
| <b>OS</b> | Yes | 92        | 5  | 92.7%                    | 0.82 (0.72, 0.93)<br>P<0.001   |
|           | No  | 5         | 35 |                          |                                |

\*Test of H0:  $\kappa = 0.40$  against H1:  $\kappa = 0.75$

**Table S3.** Joint ratings of endometriosis diagnosis (present/absent) between operating surgeon (OS) and blinded experts (R1-R4) based on empiric assessment after viewing digital images, operative report/drawing and MRI (n=36)

|           |     | <b>R1</b> |    | <b>% Classified Same</b> | <b><math>\kappa</math> (95% CI)<br/>P-value*</b> |
|-----------|-----|-----------|----|--------------------------|--------------------------------------------------|
|           |     | Yes       | No |                          |                                                  |
| <b>OS</b> | Yes | 26        | 1  | 88.9%                    | 0.68 (0.39, 0.97)<br>P=0.03                      |
|           | No  | 3         | 6  |                          |                                                  |
|           |     | <b>R2</b> |    |                          |                                                  |
|           |     | Yes       | No |                          |                                                  |
| <b>OS</b> | Yes | 25        | 2  | 86.1%                    | 0.62 (0.31, 0.92)<br>P=0.08                      |
|           | No  | 3         | 6  |                          |                                                  |
|           |     | <b>R3</b> |    |                          |                                                  |
|           |     | Yes       | No |                          |                                                  |
| <b>OS</b> | Yes | 24        | 1  | 90.6                     | 0.71 (0.41, 1.0)<br>P=0.02                       |
|           | No  | 2         | 5  |                          |                                                  |
|           |     | <b>R4</b> |    |                          |                                                  |
|           |     | Yes       | No |                          |                                                  |
| <b>OS</b> | Yes | 24        | 0  | 93.9                     | 0.84 (0.62, 1.0)<br>P<0.001                      |
|           | No  | 2         | 7  |                          |                                                  |

\*Test of H0:  $\kappa = 0.40$  against H1:  $\kappa = 0.75$

**Table S4.** Joint ratings of endometriosis diagnosis (present/absent) between operating surgeon (OS) and blinded experts (R1-R4) based on empiric assessment after viewing digital images, operative report/drawing and histopathology report (n=67)

|           |     | <b>R1</b> |    | <b>% Classified Same</b> | <b>κ (95% CI)<br/>P-value*</b> |
|-----------|-----|-----------|----|--------------------------|--------------------------------|
|           |     | Yes       | No |                          |                                |
| <b>OS</b> | Yes | 43        | 8  | 84.9%                    | 0.29 (-0.03, 0.61)<br>P=0.75   |
|           | No  | 0         | 2  |                          |                                |
|           |     | <b>R2</b> |    |                          |                                |
|           |     | Yes       | No |                          |                                |
| <b>OS</b> | Yes | 46        | 7  | 87.3%                    | 0.32 (-0.02, 0.67)<br>P=0.68   |
|           | No  | 0         | 2  |                          |                                |
|           |     | <b>R3</b> |    |                          |                                |
|           |     | Yes       | No |                          |                                |
| <b>OS</b> | Yes | 40        | 7  | 85.7%                    | 0.32 (-0.02, 0.66)<br>P=0.68   |
|           | No  | 0         | 2  |                          |                                |
|           |     | <b>R4</b> |    |                          |                                |
|           |     | Yes       | No |                          |                                |
| <b>OS</b> | Yes | 40        | 10 | 80.8%                    | 0.24 (-0.03, 0.51)<br>P=0.88   |
|           | No  | 0         | 2  |                          |                                |

\*Test of H0:  $\kappa = 0.40$  against H1:  $\kappa = 0.75$

**Table S5.** Joint ratings of endometriosis diagnosis (present/absent) between operating surgeon (OS) and blinded experts (R1-R4) based on empiric assessment after viewing digital images, operative report/drawing, MRI and histopathology report (n=22)

|           |     | <b>R1</b> |    | <b>% Classified Same</b> | <b>κ (95% CI)<br/>P-value*</b> |
|-----------|-----|-----------|----|--------------------------|--------------------------------|
|           |     | Yes       | No |                          |                                |
| <b>OS</b> | Yes | 20        | 1  | 95.5%                    | 0.65 (0.01, 1.0)<br>P=0.22     |
|           | No  | 0         | 1  |                          |                                |
|           |     | <b>R2</b> |    |                          |                                |
|           |     | Yes       | No |                          |                                |
| <b>OS</b> | Yes | 20        | 1  | 91.3%                    | 0.45 (-0.19, 1.0)<br>P=0.44    |
|           | No  | 1         | 0  |                          |                                |
|           |     | <b>R3</b> |    |                          |                                |
|           |     | Yes       | No |                          |                                |
| <b>OS</b> | Yes | 21        | 0  | 100.0%                   | 1.0<br>P<0.001                 |
|           | No  | 0         | 1  |                          |                                |
|           |     | <b>R4</b> |    |                          |                                |
|           |     | Yes       | No |                          |                                |
| <b>OS</b> | Yes | 20        | 0  | 100.0%                   | 1.0<br>P<0.001                 |
|           | No  | 0         | 1  |                          |                                |

\*Test of H0:  $\kappa = 0.40$  against H1:  $\kappa = 0.75$

**Table S6.** Joint ratings of endometriosis staging (absent, I-IV) between operating surgeon (OS) and blinded experts (R1-R4) based on empiric assessment after viewing digital images (n=148)

|    |       | R 1  |    |    |     |    |       | % classified in same stage | Weighted $\kappa$ (95% CI) <i>P</i> -value* |
|----|-------|------|----|----|-----|----|-------|----------------------------|---------------------------------------------|
|    |       | None | I  | II | III | IV | Total |                            |                                             |
| OS | None  | 26   | 7  | 0  | 0   | 0  | 33    | 55.6%                      | 0.60<br>(0.47, 0.74)<br><i>P</i> <0.001     |
|    | I     | 5    | 26 | 1  | 0   | 0  | 32    |                            |                                             |
|    | II    | 5    | 10 | 5  | 0   | 0  | 20    |                            |                                             |
|    | III   | 0    | 9  | 6  | 4   | 3  | 22    |                            |                                             |
|    | IV    | 1    | 4  | 0  | 1   | 4  | 10    |                            |                                             |
|    | Total | 37   | 56 | 12 | 5   | 7  | 117   |                            |                                             |
|    |       | R 2  |    |    |     |    |       | % classified in same stage | Weighted $\kappa$ (95% CI) <i>P</i> -value* |
|    |       | None | I  | II | III | IV | Total |                            |                                             |
| OS | None  | 33   | 9  | 0  | 1   | 0  | 43    | 43.5%                      | 0.49<br>(0.37, 0.61)<br><i>P</i> =0.07      |
|    | I     | 11   | 22 | 6  | 1   | 0  | 40    |                            |                                             |
|    | II    | 6    | 14 | 3  | 1   | 0  | 24    |                            |                                             |
|    | III   | 0    | 14 | 5  | 5   | 2  | 26    |                            |                                             |
|    | IV    | 2    | 4  | 3  | 4   | 1  | 14    |                            |                                             |
|    | Total | 52   | 63 | 17 | 12  | 3  | 147   |                            |                                             |
|    |       | R 3  |    |    |     |    |       | % classified in same stage | Weighted $\kappa$ (95% CI) <i>P</i> -value* |
|    |       | None | I  | II | III | IV | Total |                            |                                             |
| OS | None  | 24   | 5  | 1  | 0   | 0  | 30    | 45.9%                      | 0.70<br>(0.60, 0.79)<br><i>P</i> <0.001     |
|    | I     | 6    | 14 | 6  | 0   | 1  | 27    |                            |                                             |
|    | II    | 4    | 10 | 3  | 0   | 0  | 17    |                            |                                             |
|    | III   | 1    | 6  | 8  | 4   | 5  | 24    |                            |                                             |
|    | IV    | 0    | 0  | 3  | 3   | 5  | 11    |                            |                                             |
|    | Total | 35   | 35 | 21 | 7   | 11 | 109   |                            |                                             |
|    |       | R 4  |    |    |     |    |       | % classified in same stage | Weighted $\kappa$ (95% CI) <i>P</i> -value* |
|    |       | None | I  | II | III | IV | Total |                            |                                             |
| OS | None  | 26   | 4  | 2  | 0   | 0  | 32    | 48.8%                      | 0.61<br>(0.48, 0.74)<br><i>P</i> <0.001     |
|    | I     | 6    | 20 | 9  | 0   | 0  | 35    |                            |                                             |
|    | II    | 5    | 8  | 7  | 1   | 1  | 22    |                            |                                             |
|    | III   | 1    | 4  | 9  | 4   | 3  | 21    |                            |                                             |
|    | IV    | 1    | 2  | 2  | 4   | 2  | 11    |                            |                                             |
|    | Total | 39   | 38 | 29 | 9   | 6  | 121   |                            |                                             |

\*Test of H0:  $\kappa = 0.40$  against H1:  $\kappa = 0.75$

**Table S7.** Joint ratings of endometriosis staging (absent, I-IV) between operating surgeon (OS) and blinded experts (R1-R4) based on empiric assessment after viewing digital images and operative report/drawing (n=148)

|    |       | R 1  |    |    |     |    |     | Total | % classified in same stage            | Weighted $\kappa$ (95% CI) <i>P</i> -value* |
|----|-------|------|----|----|-----|----|-----|-------|---------------------------------------|---------------------------------------------|
|    |       | None | I  | II | III | IV |     |       |                                       |                                             |
| OS | None  | 31   | 7  | 1  | 0   | 1  | 40  | 62.9% | 0.83<br>0.75, 0.91<br><i>P</i> <0.001 |                                             |
|    | I     | 1    | 34 | 4  | 1   | 0  | 40  |       |                                       |                                             |
|    | II    | 0    | 18 | 6  | 0   | 0  | 24  |       |                                       |                                             |
|    | III   | 0    | 2  | 6  | 10  | 7  | 25  |       |                                       |                                             |
|    | IV    | 0    | 0  | 1  | 4   | 9  | 14  |       |                                       |                                             |
|    | Total | 32   | 61 | 18 | 15  | 17 | 143 |       |                                       |                                             |
|    |       | R 2  |    |    |     |    |     | Total | % classified in same stage            | Weighted $\kappa$ (95% CI) <i>P</i> -value* |
|    |       | None | I  | II | III | IV |     |       |                                       |                                             |
| OS | None  | 38   | 4  | 0  | 1   | 0  | 43  | 58.1% | 0.80<br>0.73, 0.87<br><i>P</i> <0.001 |                                             |
|    | I     | 3    | 31 | 5  | 1   | 0  | 40  |       |                                       |                                             |
|    | II    | 0    | 22 | 1  | 1   | 0  | 24  |       |                                       |                                             |
|    | III   | 0    | 5  | 9  | 11  | 2  | 27  |       |                                       |                                             |
|    | IV    | 0    | 0  | 2  | 7   | 5  | 14  |       |                                       |                                             |
|    | Total | 41   | 62 | 17 | 21  | 7  | 148 |       |                                       |                                             |
|    |       | R 3  |    |    |     |    |     | Total | % classified in same stage            | Weighted $\kappa$ (95% CI) <i>P</i> -value* |
|    |       | None | I  | II | III | IV |     |       |                                       |                                             |
| OS | None  | 32   | 4  | 0  | 0   | 1  | 37  | 60.9% | 0.78<br>0.67, 0.88<br><i>P</i> <0.001 |                                             |
|    | I     | 2    | 23 | 7  | 1   | 1  | 34  |       |                                       |                                             |
|    | II    | 1    | 15 | 6  | 0   | 0  | 22  |       |                                       |                                             |
|    | III   | 0    | 2  | 10 | 10  | 4  | 26  |       |                                       |                                             |
|    | IV    | 1    | 0  | 1  | 2   | 10 | 14  |       |                                       |                                             |
|    | Total | 36   | 44 | 24 | 13  | 16 | 133 |       |                                       |                                             |
|    |       | R 4  |    |    |     |    |     | Total | % classified in same stage            | Weighted $\kappa$ (95% CI) <i>P</i> -value* |
|    |       | None | I  | II | III | IV |     |       |                                       |                                             |
| OS | None  | 35   | 3  | 1  | 0   | 1  | 40  | 59.1% | 0.80<br>0.71, 0.88<br><i>P</i> <0.001 |                                             |
|    | I     | 4    | 20 | 11 | 1   | 0  | 36  |       |                                       |                                             |
|    | II    | 1    | 10 | 10 | 1   | 0  | 22  |       |                                       |                                             |
|    | III   | 0    | 3  | 7  | 9   | 6  | 25  |       |                                       |                                             |
|    | IV    | 0    | 1  | 0  | 6   | 7  | 14  |       |                                       |                                             |
|    | Total | 40   | 37 | 29 | 17  | 14 | 137 |       |                                       |                                             |

\*Test of H0:  $\kappa = 0.40$  against H1:  $\kappa = 0.75$

**Table S8.** Joint ratings of endometriosis staging (absent, I-IV) between operating surgeon (OS) and blinded experts (R1-R4) based on empiric assessment after viewing digital images, operative report/drawing and MRI Findings (n=36)

|    |       | R 1  |    |    |     |    |    | Total | % classified in same stage              | Weighted $\kappa$ (95% CI) <i>P</i> -value* |
|----|-------|------|----|----|-----|----|----|-------|-----------------------------------------|---------------------------------------------|
|    |       | None | I  | II | III | IV |    |       |                                         |                                             |
| OS | None  | 6    | 3  | 0  | 0   | 0  | 9  | 52.8% | 0.79<br>(0.66, 0.92)<br><i>P</i> <0.001 |                                             |
|    | I     | 1    | 7  | 1  | 2   | 0  | 11 |       |                                         |                                             |
|    | II    | 0    | 2  | 1  | 1   | 0  | 4  |       |                                         |                                             |
|    | III   | 0    | 2  | 1  | 2   | 3  | 8  |       |                                         |                                             |
|    | IV    | 0    | 0  | 0  | 1   | 3  | 4  |       |                                         |                                             |
|    | Total | 7    | 14 | 3  | 6   | 6  | 36 |       |                                         |                                             |
|    |       | R 2  |    |    |     |    |    | Total | % classified in same stage              | Weighted $\kappa$ (95% CI) <i>P</i> -value* |
|    |       | None | I  | II | III | IV |    |       |                                         |                                             |
| OS | None  | 6    | 3  | 0  | 0   | 0  | 9  | 47.2% | 0.77<br>(0.63, 0.90)<br><i>P</i> <0.001 |                                             |
|    | I     | 2    | 4  | 4  | 1   | 0  | 11 |       |                                         |                                             |
|    | II    | 0    | 2  | 1  | 1   | 0  | 4  |       |                                         |                                             |
|    | III   | 0    | 2  | 2  | 4   | 0  | 8  |       |                                         |                                             |
|    | IV    | 0    | 0  | 0  | 2   | 2  | 4  |       |                                         |                                             |
|    | Total | 8    | 11 | 7  | 8   | 2  | 36 |       |                                         |                                             |
|    |       | R 3  |    |    |     |    |    | Total | % classified in same stage              | Weighted $\kappa$ (95% CI) <i>P</i> -value* |
|    |       | None | I  | II | III | IV |    |       |                                         |                                             |
| OS | None  | 5    | 2  | 0  | 0   | 0  | 7  | 46.9% | 0.76<br>(0.59, 0.92)<br><i>P</i> <0.001 |                                             |
|    | I     | 1    | 4  | 2  | 1   | 1  | 9  |       |                                         |                                             |
|    | II    | 0    | 2  | 2  | 0   | 0  | 4  |       |                                         |                                             |
|    | III   | 0    | 1  | 2  | 1   | 4  | 8  |       |                                         |                                             |
|    | IV    | 0    | 0  | 0  | 1   | 3  | 4  |       |                                         |                                             |
|    | Total | 6    | 9  | 6  | 3   | 8  | 32 |       |                                         |                                             |
|    |       | R 4  |    |    |     |    |    | Total | % classified in same stage              | Weighted $\kappa$ (95% CI) <i>P</i> -value* |
|    |       | None | I  | II | III | IV |    |       |                                         |                                             |
| OS | None  | 7    | 1  | 1  | 0   | 0  | 9  | 57.6% | 0.81<br>(0.70, 0.93)<br><i>P</i> <0.001 |                                             |
|    | I     | 0    | 6  | 0  | 2   | 0  | 8  |       |                                         |                                             |
|    | II    | 0    | 1  | 2  | 1   | 0  | 4  |       |                                         |                                             |
|    | III   | 0    | 1  | 0  | 2   | 5  | 8  |       |                                         |                                             |
|    | IV    | 0    | 0  | 0  | 2   | 2  | 4  |       |                                         |                                             |
|    | Total | 7    | 9  | 3  | 7   | 7  | 33 |       |                                         |                                             |

\*Test of H0:  $\kappa = 0.40$  against H1:  $\kappa = 0.75$



**Table S9.** Joint ratings of endometriosis staging (absent, I-IV) between operating surgeon (OS) and blinded experts (R1-R4) based on empiric assessment after viewing digital images, operative report/drawing and histopathology findings (n=67)

|    |       | R 1  |    |    |     |    |    | Total | % classified in same stage      | Weighted $\kappa$ (95% CI)<br>P-value* |
|----|-------|------|----|----|-----|----|----|-------|---------------------------------|----------------------------------------|
|    |       | None | I  | II | III | IV |    |       |                                 |                                        |
| OS | None  | 2    | 0  | 0  | 0   | 0  | 2  | 54.7% | 0.82<br>(0.74, 0.90)<br>P<0.001 |                                        |
|    | I     | 6    | 12 | 1  | 0   | 0  | 19 |       |                                 |                                        |
|    | II    | 2    | 6  | 2  | 0   | 0  | 10 |       |                                 |                                        |
|    | III   | 0    | 0  | 3  | 7   | 3  | 13 |       |                                 |                                        |
|    | IV    | 0    | 0  | 1  | 2   | 6  | 9  |       |                                 |                                        |
|    | Total | 10   | 18 | 7  | 9   | 9  | 53 |       |                                 |                                        |
|    |       | R 2  |    |    |     |    |    | Total | % classified in same stage      | Weighted $\kappa$ (95% CI)<br>P-value* |
|    |       | None | I  | II | III | IV |    |       |                                 |                                        |
| OS | None  | 2    | 0  | 0  | 0   | 0  | 2  | 47.2% | 0.67<br>(0.54, 0.80)<br>P<0.001 |                                        |
|    | I     | 4    | 14 | 1  | 0   | 0  | 19 |       |                                 |                                        |
|    | II    | 2    | 8  | 0  | 0   | 0  | 10 |       |                                 |                                        |
|    | III   | 1    | 2  | 3  | 7   | 2  | 15 |       |                                 |                                        |
|    | IV    | 0    | 0  | 3  | 3   | 3  | 9  |       |                                 |                                        |
|    | Total | 9    | 24 | 7  | 10  | 5  | 55 |       |                                 |                                        |
|    |       | R 3  |    |    |     |    |    | Total | % classified in same stage      | Weighted $\kappa$ (95% CI)<br>P-value* |
|    |       | None | I  | II | III | IV |    |       |                                 |                                        |
| OS | None  | 2    | 0  | 0  | 0   | 0  | 2  | 51.0% | 0.65<br>(0.55, 0.85)<br>P<0.001 |                                        |
|    | I     | 3    | 9  | 3  | 0   | 0  | 15 |       |                                 |                                        |
|    | II    | 2    | 5  | 2  | 0   | 0  | 9  |       |                                 |                                        |
|    | III   | 1    | 2  | 3  | 5   | 3  | 14 |       |                                 |                                        |
|    | IV    | 1    | 0  | 1  | 0   | 7  | 9  |       |                                 |                                        |
|    | Total | 9    | 16 | 9  | 5   | 10 | 49 |       |                                 |                                        |
|    |       | R 4  |    |    |     |    |    | Total | % classified in same stage      | Weighted $\kappa$ (95% CI)<br>P-value* |
|    |       | None | I  | II | III | IV |    |       |                                 |                                        |
| OS | None  | 2    | 0  | 0  | 0   | 0  | 2  | 48.1% | 0.65<br>(0.46, 0.84)<br>P<0.001 |                                        |
|    | I     | 6    | 9  | 3  | 0   | 0  | 18 |       |                                 |                                        |
|    | II    | 3    | 3  | 4  | 0   | 0  | 10 |       |                                 |                                        |
|    | III   | 0    | 1  | 4  | 6   | 2  | 13 |       |                                 |                                        |
|    | IV    | 1    | 1  | 0  | 3   | 4  | 9  |       |                                 |                                        |
|    | Total | 12   | 14 | 11 | 9   | 6  | 52 |       |                                 |                                        |

\*Test of H0:  $\kappa = 0.40$  against H1:  $\kappa = 0.75$

**Table S10.** Joint ratings of endometriosis staging (absent, I-IV) between operating surgeon (OS) and blinded experts (R1-R4) based on empiric assessment after viewing digital images, operative report/drawing, MRI, and histopathology findings (n=22)

|    |       | R 1  |   |    |     |    |       | % classified in same stage | Weighted $\kappa$ (95% CI)<br>P-value* |
|----|-------|------|---|----|-----|----|-------|----------------------------|----------------------------------------|
|    |       | None | I | II | III | IV | Total |                            |                                        |
| OS | None  | 1    | 0 | 0  | 0   | 0  | 2     | 45.5%                      | 0.72<br>(0.52, 0.92)<br>P<0.001        |
|    | I     | 1    | 4 | 0  | 2   | 0  | 7     |                            |                                        |
|    | II    | 0    | 2 | 1  | 1   | 0  | 4     |                            |                                        |
|    | III   | 0    | 1 | 1  | 1   | 4  | 7     |                            |                                        |
|    | IV    | 0    | 0 | 0  | 0   | 3  | 3     |                            |                                        |
|    | Total | 2    | 7 | 2  | 4   | 7  | 22    |                            |                                        |
|    |       | R 2  |   |    |     |    |       | % classified in same stage | Weighted $\kappa$ (95% CI)<br>P-value* |
|    |       | None | I | II | III | IV | Total |                            |                                        |
| OS | None  | 0    | 1 | 0  | 0   | 0  | 1     | 45.5%                      | 0.73<br>(0.54, 0.91)<br>P<0.001        |
|    | I     | 1    | 3 | 3  | 0   | 0  | 7     |                            |                                        |
|    | II    | 0    | 2 | 1  | 1   | 0  | 4     |                            |                                        |
|    | III   | 0    | 1 | 2  | 4   | 0  | 7     |                            |                                        |
|    | IV    | 0    | 0 | 0  | 1   | 2  | 3     |                            |                                        |
|    | Total | 1    | 7 | 6  | 6   | 2  | 22    |                            |                                        |
|    |       | R 3  |   |    |     |    |       | % classified in same stage | Weighted $\kappa$ (95% CI)<br>P-value* |
|    |       | None | I | II | III | IV | Total |                            |                                        |
| OS | None  | 1    | 0 | 0  | 0   | 0  | 1     | 45.5%                      | 0.65<br>(0.37, 0.93)<br>P=0.01         |
|    | I     | 0    | 2 | 3  | 1   | 1  | 7     |                            |                                        |
|    | II    | 0    | 1 | 3  | 0   | 0  | 4     |                            |                                        |
|    | III   | 0    | 0 | 2  | 1   | 4  | 7     |                            |                                        |
|    | IV    | 0    | 0 | 0  | 0   | 3  | 3     |                            |                                        |
|    | Total | 1    | 3 | 8  | 2   | 8  | 22    |                            |                                        |
|    |       | R 4  |   |    |     |    |       | % classified in same stage | Weighted $\kappa$ (95% CI)<br>P-value* |
|    |       | None | I | II | III | IV | Total |                            |                                        |
| OS | None  | 1    | 0 | 0  | 0   | 0  | 1     | 52.4%                      | 0.76<br>(0.57, 0.94)<br>P<0.001        |
|    | I     | 0    | 4 | 0  | 2   | 0  | 6     |                            |                                        |
|    | II    | 0    | 1 | 2  | 1   | 0  | 4     |                            |                                        |
|    | III   | 0    | 0 | 0  | 2   | 5  | 7     |                            |                                        |
|    | IV    | 0    | 0 | 0  | 1   | 2  | 3     |                            |                                        |
|    | Total | 1    | 5 | 2  | 6   | 7  | 21    |                            |                                        |

\*Test of H0:  $\kappa = 0.40$  against H1:  $\kappa = 0.75$

**Table S11.** Joint ratings of endometriosis staging (absent, I-IV) between operating surgeon (OS) and blinded experts (R1-R4) based on rASRM algorithm assessment after viewing digital images (n=148)

|    |       | R 1  |    |    |     |    | Total | % classified in same stage | Weighted $\kappa$ (95% CI)<br>P-value* |
|----|-------|------|----|----|-----|----|-------|----------------------------|----------------------------------------|
|    |       | None | I  | II | III | IV |       |                            |                                        |
| OS | None  | 26   | 6  | 0  | 0   | 0  | 32    | 58.9%                      | 0.66<br>0.53,0.80<br>P<0.001           |
|    | I     | 7    | 36 | 3  | 0   | 0  | 46    |                            |                                        |
|    | II    | 3    | 7  | 2  | 1   | 1  | 14    |                            |                                        |
|    | III   | 1    | 4  | 0  | 2   | 0  | 7     |                            |                                        |
|    | IV    | 0    | 4  | 0  | 2   | 0  | 7     |                            |                                        |
|    | Total | 37   | 57 | 5  | 5   | 7  | 112   |                            |                                        |
|    |       | R 2  |    |    |     |    | Total | % classified in same stage | Weighted $\kappa$ (95% CI)<br>P-value* |
|    |       | None | I  | II | III | IV |       |                            |                                        |
| OS | None  | 33   | 7  | 0  | 2   | 0  | 42    | 52.1%                      | 0.53<br>0.40, 0.67<br>P=0.03           |
|    | I     | 13   | 35 | 6  | 1   | 0  | 55    |                            |                                        |
|    | II    | 3    | 8  | 1  | 3   | 1  | 16    |                            |                                        |
|    | III   | 2    | 5  | 1  | 2   | 1  | 11    |                            |                                        |
|    | IV    | 1    | 6  | 2  | 6   | 3  | 18    |                            |                                        |
|    | Total | 52   | 61 | 10 | 14  | 5  | 142   |                            |                                        |
|    |       | R 3  |    |    |     |    | Total | % classified in same stage | Weighted $\kappa$ (95% CI)<br>P-value* |
|    |       | None | I  | II | III | IV |       |                            |                                        |
| OS | None  | 24   | 5  | 0  | 0   | 0  | 29    | 60.6%                      | 0.78<br>0.68, 0.87<br>P<0.001          |
|    | I     | 9    | 20 | 6  | 3   | 0  | 38    |                            |                                        |
|    | II    | 1    | 4  | 5  | 2   | 1  | 13    |                            |                                        |
|    | III   | 1    | 1  | 1  | 5   | 1  | 9     |                            |                                        |
|    | IV    | 0    | 1  | 3  | 2   | 9  | 15    |                            |                                        |
|    | Total | 35   | 31 | 15 | 12  | 11 | 104   |                            |                                        |
|    |       | R 4  |    |    |     |    | Total | % classified in same stage | Weighted $\kappa$ (95% CI)<br>P-value* |
|    |       | None | I  | II | III | IV |       |                            |                                        |
| OS | None  | 26   | 4  | 1  | 0   | 0  | 31    | 55.1%                      | 0.60<br>0.47,0.74<br>P<0.001           |
|    | I     | 8    | 29 | 12 | 0   | 0  | 49    |                            |                                        |
|    | II    | 1    | 4  | 5  | 2   | 2  | 14    |                            |                                        |
|    | III   | 3    | 0  | 2  | 3   | 0  | 8     |                            |                                        |
|    | IV    | 1    | 1  | 6  | 5   | 1  | 14    |                            |                                        |
|    | Total | 39   | 38 | 26 | 10  | 3  | 116   |                            |                                        |

\*Test of H0:  $\kappa = 0.40$  against H1:  $\kappa = 0.75$

**Table S12.** Joint ratings of endometriosis staging (absent, I-IV) between operating surgeon (OS) and blinded “international” expert (R1-R4) based on rASRM algorithm assessment after viewing digital images and operative report/drawing (n=148)

|    |       | R 1  |    |    |     |    | Total | % classified in same stage | Weighted $\kappa$ (95% CI)<br>P-value* |
|----|-------|------|----|----|-----|----|-------|----------------------------|----------------------------------------|
|    |       | None | I  | II | III | IV |       |                            |                                        |
| OS | None  | 31   | 6  | 1  | 0   | 1  | 39    | 73.0%                      | 0.86<br>0.78,0.94<br>P<0.001           |
|    | I     | 1    | 47 | 7  | 0   | 0  | 55    |                            |                                        |
|    | II    | 0    | 8  | 4  | 2   | 2  | 16    |                            |                                        |
|    | III   | 0    | 0  | 1  | 6   | 2  | 9     |                            |                                        |
|    | IV    | 0    | 0  | 1  | 5   | 12 | 18    |                            |                                        |
|    | Total | 32   | 61 | 14 | 13  | 17 | 137   |                            |                                        |
|    |       | R 2  |    |    |     |    | Total | % classified in same stage | Weighted $\kappa$ (95% CI)<br>P-value* |
|    |       | None | I  | II | III | IV |       |                            |                                        |
| OS | None  | 38   | 2  | 1  | 1   | 0  | 42    | 68.3%                      | 0.84<br>0.77, 0.90<br>P<0.001          |
|    | I     | 3    | 44 | 7  | 2   | 0  | 56    |                            |                                        |
|    | II    | 0    | 10 | 2  | 2   | 2  | 16    |                            |                                        |
|    | III   | 0    | 2  | 2  | 4   | 2  | 10    |                            |                                        |
|    | IV    | 0    | 0  | 1  | 8   | 9  | 18    |                            |                                        |
|    | Total | 41   | 58 | 13 | 17  | 13 | 142   |                            |                                        |
|    |       | R 3  |    |    |     |    | Total | % classified in same stage | Weighted $\kappa$ (95% CI)<br>P-value* |
|    |       | None | I  | II | III | IV |       |                            |                                        |
| OS | None  | 32   | 2  | 1  | 0   | 1  | 36    | 74.6%                      | 0.84<br>0.76, 0.93<br>P<0.001          |
|    | I     | 3    | 34 | 7  | 3   | 0  | 47    |                            |                                        |
|    | II    | 0    | 2  | 7  | 4   | 3  | 16    |                            |                                        |
|    | III   | 1    | 0  | 0  | 7   | 2  | 10    |                            |                                        |
|    | IV    | 0    | 0  | 0  | 3   | 14 | 17    |                            |                                        |
|    | Total | 36   | 38 | 15 | 17  | 20 | 126   |                            |                                        |
|    |       | R 4  |    |    |     |    | Total | % classified in same stage | Weighted $\kappa$ (95% CI)<br>P-value* |
|    |       | None | I  | II | III | IV |       |                            |                                        |
| OS | None  | 35   | 3  | 0  | 0   | 1  | 39    | 71.2%                      | 0.86<br>0.77,0.94<br>P<0.001           |
|    | I     | 4    | 35 | 13 | 0   | 0  | 52    |                            |                                        |
|    | II    | 0    | 2  | 8  | 3   | 2  | 15    |                            |                                        |
|    | III   | 1    | 0  | 1  | 5   | 1  | 8     |                            |                                        |
|    | IV    | 0    | 0  | 0  | 7   | 11 | 18    |                            |                                        |
|    | Total | 40   | 40 | 22 | 15  | 15 | 132   |                            |                                        |

\*Test of H0:  $\kappa = 0.40$  against H1:  $\kappa = 0.75$

**Table S13.** Joint ratings of endometriosis staging (absent, I-IV) between operating surgeon (OS) and blinded “international” expert (R1-R4) based on rASRM algorithm assessment after viewing digital images, operative report/drawing, and MRI findings (n=36)

|    |       | R 1  |    |    |     |    | Total | % classified in same stage | Weighted $\kappa$ (95% CI)<br>P-value* |
|----|-------|------|----|----|-----|----|-------|----------------------------|----------------------------------------|
|    |       | None | I  | II | III | IV |       |                            |                                        |
| OS | None  | 6    | 2  | 0  | 0   | 0  | 8     | 69.7%                      | 0.89<br>(0.80, 0.98)<br>P<0.001        |
|    | I     | 1    | 8  | 2  | 1   | 0  | 12    |                            |                                        |
|    | II    | 0    | 1  | 2  | 0   | 0  | 3     |                            |                                        |
|    | III   | 0    | 1  | 0  | 0   | 0  | 1     |                            |                                        |
|    | IV    | 0    | 0  | 0  | 2   | 7  | 9     |                            |                                        |
|    | Total | 7    | 12 | 4  | 3   | 7  | 33    |                            |                                        |
|    |       | R 2  |    |    |     |    | Total | % classified in same stage | Weighted $\kappa$ (95% CI)<br>P-value* |
|    |       | None | I  | II | III | IV |       |                            |                                        |
| OS | None  | 6    | 1  | 1  | 0   | 0  | 8     | 54.5%                      | 0.81<br>(0.69, 0.94)<br>P<0.001        |
|    | I     | 2    | 5  | 4  | 1   | 0  | 12    |                            |                                        |
|    | II    | 0    | 2  | 1  | 0   | 0  | 3     |                            |                                        |
|    | III   | 0    | 1  | 0  | 0   | 0  | 1     |                            |                                        |
|    | IV    | 0    | 0  | 1  | 2   | 6  | 9     |                            |                                        |
|    | Total | 8    | 9  | 7  | 3   | 6  | 33    |                            |                                        |
|    |       | R 3  |    |    |     |    | Total | % classified in same stage | Weighted $\kappa$ (95% CI)<br>P-value* |
|    |       | None | I  | II | III | IV |       |                            |                                        |
| OS | None  | 5    | 1  | 0  | 0   | 0  | 6     | 75.9%                      | 0.89<br>(0.79, 0.99)<br>P<0.001        |
|    | I     | 1    | 6  | 0  | 3   | 0  | 10    |                            |                                        |
|    | II    | 0    | 1  | 1  | 1   | 0  | 3     |                            |                                        |
|    | III   | 0    | 0  | 0  | 1   | 0  | 1     |                            |                                        |
|    | IV    | 0    | 0  | 0  | 0   | 9  | 9     |                            |                                        |
|    | Total | 6    | 8  | 1  | 5   | 9  | 29    |                            |                                        |
|    |       | R 4  |    |    |     |    | Total | % classified in same stage | Weighted $\kappa$ (95% CI)<br>P-value* |
|    |       | None | I  | II | III | IV |       |                            |                                        |
| OS | None  | 7    | 1  | 0  | 0   | 0  | 8     | 76.7%                      | 0.89<br>(0.80, 0.99)<br>P<0.001        |
|    | I     | 0    | 7  | 0  | 2   | 0  | 9     |                            |                                        |
|    | II    | 0    | 0  | 2  | 0   | 1  | 3     |                            |                                        |
|    | III   | 0    | 0  | 0  | 1   | 0  | 1     |                            |                                        |
|    | IV    | 0    | 0  | 0  | 3   | 6  | 9     |                            |                                        |
|    | Total | 7    | 8  | 2  | 6   | 7  | 30    |                            |                                        |

\*Test of H0:  $\kappa = 0.40$  against H1:  $\kappa = 0.75$

**Table S14.** Joint ratings of endometriosis staging (absent, I-IV) between operating surgeon (OS) and blinded “international” expert (R1-R4) based on rASRM algorithm assessment after viewing digital images, operative report/drawing, and histopathology findings (n=67)

|    |       | R 1  |    |    |     |    | Total | % classified in same stage | Weighted $\kappa$ (95% CI)<br>P-value* |
|----|-------|------|----|----|-----|----|-------|----------------------------|----------------------------------------|
|    |       | None | I  | II | III | IV |       |                            |                                        |
| OS | None  | 2    | 0  | 0  | 0   | 0  | 2     | 56.6%                      | 0.75<br>(0.62, 0.88)<br>P<0.001        |
|    | I     | 6    | 16 | 5  | 0   | 0  | 27    |                            |                                        |
|    | II    | 1    | 2  | 0  | 1   | 2  | 6     |                            |                                        |
|    | III   | 1    | 0  | 0  | 6   | 1  | 8     |                            |                                        |
|    | IV    | 0    | 0  | 2  | 2   | 6  | 10    |                            |                                        |
|    | Total | 10   | 18 | 7  | 9   | 9  | 53    |                            |                                        |
|    |       | R 2  |    |    |     |    | Total | % classified in same stage | Weighted $\kappa$ (95% CI)<br>P-value* |
|    |       | None | I  | II | III | IV |       |                            |                                        |
| OS | None  | 2    | 0  | 0  | 0   | 0  | 2     | 52.7%                      | 0.63<br>(0.43, 0.82)<br>P<0.001        |
|    | I     | 5    | 19 | 2  | 1   | 0  | 27    |                            |                                        |
|    | II    | 1    | 2  | 0  | 2   | 1  | 6     |                            |                                        |
|    | III   | 0    | 3  | 3  | 4   | 0  | 10    |                            |                                        |
|    | IV    | 1    | 0  | 2  | 3   | 4  | 10    |                            |                                        |
|    | Total | 9    | 24 | 7  | 10  | 5  | 55    |                            |                                        |
|    |       | R 3  |    |    |     |    | Total | % classified in same stage | Weighted $\kappa$ (95% CI)<br>P-value* |
|    |       | None | I  | II | III | IV |       |                            |                                        |
| OS | None  | 2    | 0  | 0  | 0   | 0  | 2     | 44.9%                      | 0.64<br>(0.46, 0.81)<br>P<0.001        |
|    | I     | 4    | 12 | 5  | 1   | 0  | 22    |                            |                                        |
|    | II    | 2    | 1  | 0  | 1   | 2  | 6     |                            |                                        |
|    | III   | 1    | 2  | 4  | 1   | 1  | 9     |                            |                                        |
|    | IV    | 0    | 1  | 0  | 2   | 7  | 10    |                            |                                        |
|    | Total | 9    | 16 | 9  | 5   | 10 | 49    |                            |                                        |
|    |       | R 4  |    |    |     |    | Total | % classified in same stage | Weighted $\kappa$ (95% CI)<br>P-value* |
|    |       | None | I  | II | III | IV |       |                            |                                        |
| OS | None  | 2    | 0  | 0  | 0   | 0  | 2     | 50.0%                      | 0.65<br>(0.46, 0.85)<br>P<0.001        |
|    | I     | 6    | 14 | 6  | 0   | 0  | 26    |                            |                                        |
|    | II    | 2    | 0  | 2  | 1   | 1  | 6     |                            |                                        |
|    | III   | 1    | 0  | 2  | 4   | 1  | 8     |                            |                                        |
|    | IV    | 1    | 0  | 1  | 4   | 4  | 10    |                            |                                        |
|    | Total | 12   | 14 | 11 | 9   | 6  | 52    |                            |                                        |

\*Test of H0:  $\kappa = 0.40$  against H1:  $\kappa = 0.75$

**Table S15.** Joint ratings of endometriosis staging (absent, I-IV) between operating surgeon (OS) and blinded “international” expert (R1-R4) based on rASRM algorithm assessment after viewing digital images, operative report/drawing, MRI, and histopathology findings (n=22)

|           |              | <b>R 1</b>  |          |           |            |           | <b>Total</b> | <b>% classified in same stage</b> | <b>Weighted <math>\kappa</math> (95% CI) <i>P</i>-value*</b> |
|-----------|--------------|-------------|----------|-----------|------------|-----------|--------------|-----------------------------------|--------------------------------------------------------------|
|           |              | <b>None</b> | <b>I</b> | <b>II</b> | <b>III</b> | <b>IV</b> |              |                                   |                                                              |
| <b>OS</b> | <b>None</b>  | 1           | 0        | 0         | 0          | 0         | 1            | 68.2%                             | 0.78<br>(0.60, 0.96)<br><i>P</i> <0.001                      |
|           | <b>I</b>     | 1           | 5        | 0         | 3          | 0         | 9            |                                   |                                                              |
|           | <b>II</b>    | 0           | 1        | 2         | 0          | 0         | 3            |                                   |                                                              |
|           | <b>III</b>   | 0           | 1        | 0         | 0          | 0         | 1            |                                   |                                                              |
|           | <b>IV</b>    | 0           | 0        | 0         | 1          | 7         | 8            |                                   |                                                              |
|           | <b>Total</b> | 2           | 7        | 2         | 4          | 7         | 22           |                                   |                                                              |
|           |              | <b>R 2</b>  |          |           |            |           | <b>Total</b> | <b>% classified in same stage</b> | <b>Weighted <math>\kappa</math> (95% CI) <i>P</i>-value*</b> |
|           |              | <b>None</b> | <b>I</b> | <b>II</b> | <b>III</b> | <b>IV</b> |              |                                   |                                                              |
| <b>OS</b> | <b>None</b>  | 0           | 1        | 0         | 0          | 0         | 1            | 27.2%                             | 0.65<br>(0.45, 0.83)<br><i>P</i> <0.001                      |
|           | <b>I</b>     | 1           | 4        | 3         | 1          | 0         | 9            |                                   |                                                              |
|           | <b>II</b>    | 0           | 2        | 0         | 1          | 0         | 3            |                                   |                                                              |
|           | <b>III</b>   | 0           | 0        | 1         | 0          | 0         | 1            |                                   |                                                              |
|           | <b>IV</b>    | 0           | 0        | 2         | 4          | 2         | 8            |                                   |                                                              |
|           | <b>Total</b> | 1           | 7        | 6         | 6          | 2         | 22           |                                   |                                                              |
|           |              | <b>R 3</b>  |          |           |            |           | <b>Total</b> | <b>% classified in same stage</b> | <b>Weighted <math>\kappa</math> (95% CI) <i>P</i>-value*</b> |
|           |              | <b>None</b> | <b>I</b> | <b>II</b> | <b>III</b> | <b>IV</b> |              |                                   |                                                              |
| <b>OS</b> | <b>None</b>  | 1           | 0        | 0         | 0          | 0         | 1            | 59.0%                             | 0.81<br>(0.66, 0.97)<br><i>P</i> <0.001                      |
|           | <b>I</b>     | 0           | 2        | 5         | 2          | 0         | 9            |                                   |                                                              |
|           | <b>II</b>    | 0           | 1        | 2         | 0          | 0         | 3            |                                   |                                                              |
|           | <b>III</b>   | 0           | 0        | 1         | 0          | 0         | 1            |                                   |                                                              |
|           | <b>IV</b>    | 0           | 0        | 0         | 0          | 8         | 8            |                                   |                                                              |
|           | <b>Total</b> | 1           | 3        | 8         | 2          | 8         | 22           |                                   |                                                              |
|           |              | <b>R 4</b>  |          |           |            |           | <b>Total</b> | <b>% classified in same stage</b> | <b>Weighted <math>\kappa</math> (95% CI) <i>P</i>-value*</b> |
|           |              | <b>None</b> | <b>I</b> | <b>II</b> | <b>III</b> | <b>IV</b> |              |                                   |                                                              |
| <b>OS</b> | <b>None</b>  | 1           | 0        | 0         | 0          | 0         | 1            | 71.4%                             | 0.77<br>(0.58, 0.97)<br><i>P</i> <0.001                      |
|           | <b>I</b>     | 0           | 5        | 0         | 3          | 0         | 8            |                                   |                                                              |
|           | <b>II</b>    | 0           | 0        | 2         | 0          | 1         | 3            |                                   |                                                              |
|           | <b>III</b>   | 0           | 0        | 0         | 1          | 0         | 1            |                                   |                                                              |
|           | <b>IV</b>    | 0           | 0        | 0         | 2          | 6         | 8            |                                   |                                                              |
|           | <b>Total</b> | 1           | 5        | 2         | 6          | 7         | 21           |                                   |                                                              |

\*Test of H0:  $\kappa = 0.40$  against H1:  $\kappa = 0.75$
